# Supplementary material for: Where have all the tadpoles gone? Individual genetic tracking of amphibian larvae until adulthood
Source: PubMed Central journal article supplement — Mol Ecol Resour. Author manuscript; Available in PMC 2015 Jul 1. (PMC4402230; doi:10.1111/1755-0998.12345), 2014-11-26
Supplement: NIHMS61810-supplement-Fig__S1.pdf [file NIHMS61810-supplement-Fig__S1.pdf]

Fig. S1 Ventral patterns of all corresponding juveniles and adults.

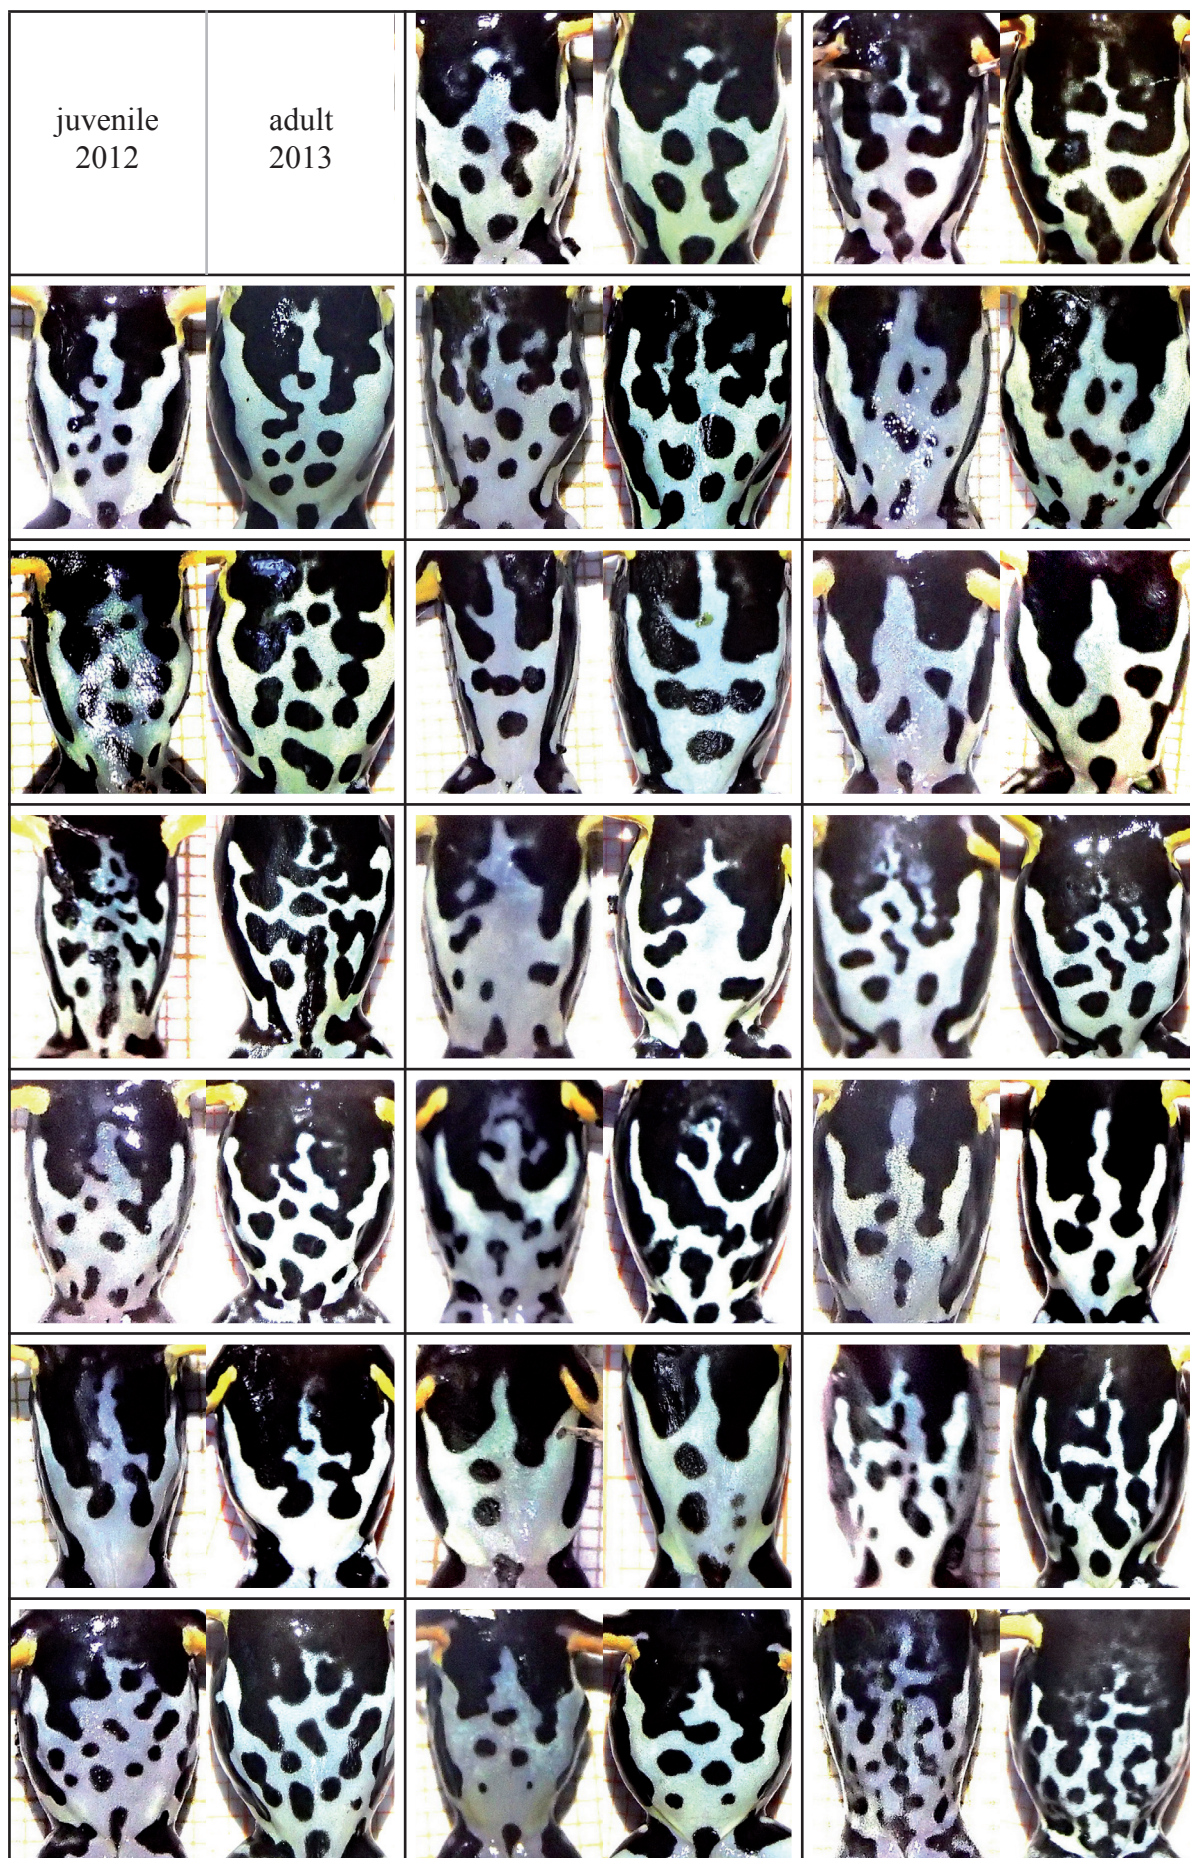

In all images the contrast was enhanced for pattern recognition in Wild-ID.
